# Supplementary material for: Benefits of Mobile Apps in Pain Management: Systematic Review
Source: PubMed Central journal article supplement (PMC6231845; doi:10.2196/11231), 2018-10-22
Supplement: mhealth_v6i10e11231_app1.pdf [file mhealth_v6i10e11231_app1.pdf]

**Multimedia Appendix 1: Search strategy for Ovid MEDLINE(R).**

|   | <b>Searches</b>                                                                                                                                                                                                                                                                                                                                                                                                                                             | <b>Results</b> |
|---|-------------------------------------------------------------------------------------------------------------------------------------------------------------------------------------------------------------------------------------------------------------------------------------------------------------------------------------------------------------------------------------------------------------------------------------------------------------|----------------|
| 1 | ("27713649" or "25565585" or "26769149" or "28811270" or "28528981" or "24999983" or "24921074" or "25138438" or "12237213" or "27898460" or "11275385" or "28423223" or "23291270" or "23538392" or "25370138" or "29061558" or "20580526" or "14736583" or "28337948" or "27089351" or "27583140" or "24422990" or "22133450" or "24535055" or "26507916" or "28570436" or "24604571").ui.                                                                | 31             |
| 2 | exp Pain/ or (pain or headache or backache).ti,ab. 772082                                                                                                                                                                                                                                                                                                                                                                                                   | 772'082        |
| 3 | exp cell phones/ or exp Computers, Handheld/ or exp Mobile Applications/ or exp Telemedicine/ or (smartphone* or ipad* or " Personal Digital Assistant*" or pda* or palmtop*).ti,ab. or ((mobile or portable) adj3 (phone* or device*)).ti,ab. or ((internet or web or electronic) adj3 diar*).ti,ab. or (app or apps).ti. or ((mobile or e-health or ehealth or m-health or mhealth or electronic or digital or web or internet) adj3 application*).ti,ab. | 73'083         |
| 4 | 2 and 3                                                                                                                                                                                                                                                                                                                                                                                                                                                     | 1'605          |
| 5 | exp Pain Management/ or (pain adj4 (manag* or monitor* or scal* or scor* or assess* or intensit* or diar*).ti,ab. or (self adj1 (manag* or monitor* or report*)).ti,ab.                                                                                                                                                                                                                                                                                     | 284'749        |
| 6 | 2 and 3 and 5                                                                                                                                                                                                                                                                                                                                                                                                                                               | 689            |
| 7 | limit 6 to (english or german)                                                                                                                                                                                                                                                                                                                                                                                                                              | 675            |
| 8 | 1 not 7                                                                                                                                                                                                                                                                                                                                                                                                                                                     | 1              |
