# Supplementary material for: Benefits of Mobile Apps in Pain Management: Systematic Review
Source: PubMed Central journal article supplement (PMC6231845; doi:10.2196/11231), 2018-10-22
Supplement: mhealth_v6i10e11231_app2.pdf [file mhealth_v6i10e11231_app2.pdf]

## Multimedia Appendix 2: Baseline characteristics of all included studies.

| Author, Year                      | Study design      | Groups, n | Device             | Setting    | Patients, N | Female, n (%) | Mean age (SD)            | Follow up, days   | Type of pain                        | Type of App                    |
|-----------------------------------|-------------------|-----------|--------------------|------------|-------------|---------------|--------------------------|-------------------|-------------------------------------|--------------------------------|
| Blödt et al, 2018 [21]            | RCT <sup>a</sup>  | 2         | S <sup>b</sup>     | out-clinic | 221         | 221 (100)     | 24 (3.6)                 | 174 <sup>c</sup>  | recurrent menstrual pain            | pain diary                     |
| Sun et al, 2017 [27]              | RCT               | 2         | S                  | out-clinic | 46          | 14 (30.4)     | 67.5 (N/A <sup>d</sup> ) | 14                | chronic cancer                      | pain scale                     |
| Skrepnik et al, 2017 [25]         | RCT               | 2         | S                  | out-clinic | 211         | 106 (50.2)    | 62.6 (9.4)               | 90                | chronic walking pain                | pain scale                     |
| Raj et al, 2017 [34]              | cBAS <sup>e</sup> | 2         | T <sup>f</sup>     | in-clinic  | 214         | 103 (48.1)    | 60.1 (12.7)              | 21                | chronic cancer                      | pain scale                     |
| Oldenmenger et al, 2018 [33]      | BAS <sup>g</sup>  | 1         | S/T/C <sup>h</sup> | out-clinic | 84          | 44 (52.4)     | 59 (11)                  | 42                | chronic cancer                      | pain diary                     |
| Lee et al, 2017 [32]              | BAS               | 1         | S                  | out-clinic | 23          | 10 (43.5)     | 28.1 (3)                 | 56                | chronic neck pain                   | pain scale                     |
| Jibb et al, 2017 [31]             | BAS               | 1         | S                  | out-clinic | 40          | 17 (42.5)     | 14.2 (1.7)               | 28                | chronic cancer                      | pain scale                     |
| Huber et al, 2017 [35]            | RDA <sup>i</sup>  | 1         | S/T/C              | out-clinic | 180         | 105 (58.3)    | 33.9 (10.9)              | 84                | chronic low back pain               | pain diary                     |
| Jamison et al, 2016 [30]          | BAS               | 1         | S                  | out-clinic | 90          | 58 (64.4)     | 46.7 (12.9)              | 180               | chronic pain                        | pain scale                     |
| Guétin, de Diego et al, 2016 [29] | BAS               | 1         | S                  | in-clinic  | 53          | 42 (79.3)     | 47.4 (16.5)              | n.a. <sup>j</sup> | chronic pain                        | receptive music intervention   |
| Guétin, Brun et al, 2016 [28]     | BAS               | 1         | S                  | in-clinic  | 35          | 17 (48.6)     | 61.3 (11.6)              | n.a.              | acute pain before coronarography    | receptive music intervention   |
| Stinley et al, 2015 [26]          | RCT               | 2         | T                  | in-clinic  | 40          | 20 (50)       | 12.3 (2.9)               | n.a.              | acute needle stick pain             | distraction while intervention |
| Schatz et al, 2015 [24]           | RCT               | 2         | S                  | out-clinic | 46          | 27 (58.7)     | 13 (2.5)                 | 112               | chronic pain in sickle cell disease | pain diary                     |
| Irvine et al, 2015 [23]           | RCT               | 3         | S/T/C              | out-clinic | 597         | 358 (60)      | N/A (N/A)                | 112               | chronic low back pain               | pain scale                     |
| Guillory et al, 2015 [22]         | RCT               | 2         | S                  | out-clinic | 82          | 51 (75)       | 48.6 (11.6)              | 28                | chronic non cancer pain             | pain scale                     |

- <sup>a</sup>RCT: Randomized controlled trial.
- <sup>b</sup>S: Smartphone.
- <sup>c</sup>: Duration of six menstruation cycles with a mean of 29 days.
- <sup>d</sup>N/A: Not available.
- <sup>e</sup>cBAS: Controlled before-after study.
- <sup>f</sup>T: Computer tablet
- <sup>g</sup>BAS: Before-after study.
- <sup>h</sup>C: Computer.
- <sup>i</sup>RDA: Retrospective data analysis.
- <sup>j</sup>n.a.: Not applicable.

## References:

21. Blödt S, Pach D, Eisenhart-Rothe SV, Lotz F, Roll S, Icke K, Witt CM. Effectiveness of app-based self-acupressure for women with menstrual pain compared to usual care: a randomized pragmatic trial. *Am J Obstet Gynecol* 2018 Feb; 218(2):227.e1-227.e9
22. Guillory J, Chang P, Henderson CR, Shengelia R, Lama S, Warmington M, Jowza M, Waldman S, Gay G, Reid MC. Piloting a Text Message-based Social Support Intervention for Patients With Chronic Pain: Establishing Feasibility and Preliminary Efficacy. *Clin J Pain* 2015 Jun; 31(6):548-56
23. Irvine AB, Russell H, Manocchia M, Mino DE, Cox GT, Morgan R, Gau JM, Birney AJ, Ary DV. Mobile-Web app to self-manage low back pain: randomized controlled trial. *J Med Internet Res* 2015 Jan 02; 17(1):e1
24. Schatz J, Schlenz AM, McClellan CB, Puffer ES, Hardy S, Pfeiffer M, Roberts CW. Changes in coping, pain, and activity after cognitive-behavioral training: a randomized clinical trial for pediatric sickle cell disease using smartphones. *Clin J Pain* 2015 Jun; 31(6):536-47
25. Skrepnik N, Spitzer A, Altman R, Hoekstra J, Stewart J, Toselli R. Assessing the Impact of a Novel Smartphone Application Compared With Standard Follow-Up on Mobility of Patients With Knee Osteoarthritis Following Treatment With Hyaluronate: A Randomized Controlled Trial. *JMIR Mhealth Uhealth* 2017 May 09; 5(5):e64
26. Stinley N, Norris D, Hinds P. Creating Mandalas for the Management of Acute Pain Symptoms in Pediatric Patients. *Art Therapy* 2015 Jun 22; 32(2):46-53
27. Sun Y, Jiang F, Gu JJ, Wang YK, Hua H, Li J, Cheng Z, Liao Z, Huang Q, Hu W, Ding G. Development and Testing of an Intelligent Pain Management System (IPMS) on Mobile Phones Through a Randomized Trial Among Chinese Cancer Patients: A New Approach in Cancer Pain Management. *JMIR Mhealth Uhealth* 2017 Jul 25; 5(7):e108
28. Guétin S, Brun L, Deniaud M, Clerc J, Thayer JF, Koenig J. Smartphone-based Music Listening to Reduce Pain and Anxiety Before Coronarography: A Focus on Sex Differences. *Altern Ther Health Med* 2016 Jul; 22(4):60-3
29. Guétin S, Diego E, Mohy F, Adolphe C, Hoareau G, Touchon J, Thayer Jf, Koenig J. A patient-controlled, smartphone-based music intervention to reduce pain—A multi-center observational study of patients with chronic pain. *European Journal of Integrative Medicine* 2016 Jun; 8(3):182-187
30. Jamison RN, Mei A, Ross EL. Longitudinal trial of a smartphone pain application for chronic pain patients: Predictors of compliance and satisfaction. *J Telemed Telecare* 2018 Feb; 24(2):93-100
31. Jibb LA, Stevens BJ, Nathan PC, Seto E, Cafazzo JA, Johnston DL, Hum V, Stinson JN. Implementation and preliminary effectiveness of a real-time pain management smartphone app for adolescents with cancer: A multicenter pilot clinical study. *Pediatr Blood Cancer* 2017 Oct; 64(10)
32. Lee M, Lee SH, Kim T, Yoo H, Kim SH, Suh D, Son J, Yoon B. Feasibility of a Smartphone-Based Exercise Program for Office Workers With Neck Pain: An Individualized Approach Using a Self-Classification Algorithm. *Arch Phys Med Rehabil* 2017 Dec; 98(1):80-87
33. Oldenmenger WH, Baan MAG, van der Rijt CCD. Development and feasibility of a web application to monitor patients' cancer-related pain. *Support Care Cancer* 2018 Feb; 26(2):635-642
34. Raj SX, Brunelli C, Klepstad P, Kaasa S. COMBAT study - Computer based assessment and treatment - A clinical trial evaluating impact of a computerized clinical decision support tool on pain in cancer patients. *Scand J Pain* 2017 Oct; 17:99-106
35. Huber S, Priebe JA, Baumann K, Plidschun A, Schiessl C, Tölle TR. Treatment of Low Back Pain with a Digital Multidisciplinary Pain Treatment App: Short-Term Results. *JMIR Rehabil Assist Technol* 2017 Dec 04; 4(2):e11
